# Supplementary material
Source: PubMed Central journal article supplement (PMC3710097)
Supplement: NIHMS487708-supplement-3.pdf [file NIHMS487708-supplement-3.pdf]

## MANUSCRIPT CHECKLIST

|                                                                                                                                                                       | Yes | N/A |
|-----------------------------------------------------------------------------------------------------------------------------------------------------------------------|-----|-----|
| <b>TITLE</b>                                                                                                                                                          |     |     |
| No more than 15 words                                                                                                                                                 | ✓   |     |
| Does not contain punctuation                                                                                                                                          | ✓   |     |
|                                                                                                                                                                       |     |     |
| <b>AUTHORS</b>                                                                                                                                                        |     |     |
| Full postal address for all authors is provided                                                                                                                       | ✓   |     |
| One e-mail address for correspondence is provided                                                                                                                     | ✓   |     |
| Maximum of three equally contributing authors (further contributions can be outlined in the author contribution statement)                                            | ✓   |     |
|                                                                                                                                                                       |     |     |
| <b>ABSTRACT</b>                                                                                                                                                       |     |     |
| No more than 150 words                                                                                                                                                | ✓   |     |
| Does not contain references                                                                                                                                           | ✓   |     |
| Results of the current study are written in present tense                                                                                                             | ✓   |     |
| Starts with short description of background (2-3 sentences)                                                                                                           | ✓   |     |
| Continues with presentation of the major results ('Here we show' or similar)                                                                                          | ✓   |     |
| Ends with a description of the paper's conclusion                                                                                                                     | ✓   |     |
|                                                                                                                                                                       |     |     |
| <b>MAIN TEXT</b>                                                                                                                                                      |     |     |
| No more than 4000 words in total (Introduction, Results, Discussion)                                                                                                  | ✓   |     |
| Section order is: Title, Abstract, Introduction, Results, Discussion, Methods, References, End Notes, Figure legends, Tables                                          | ✓   |     |
| Main text is provided as a Word or Tex document                                                                                                                       | ✓   |     |
| Abbreviations are defined at first use                                                                                                                                | ✓   |     |
| Genes and genotypes are italicized                                                                                                                                    |     | ✓   |
| Mathematical equations: Variables and scalars are displayed in italics, vectors in boldface; Subscripts are displayed in normal font (unless they are variables)      | ✓   |     |
|                                                                                                                                                                       |     |     |
| <b>Introduction</b>                                                                                                                                                   |     |     |
| Less than 1000 words                                                                                                                                                  | ✓   |     |
| Contains no subheadings                                                                                                                                               | ✓   |     |
| Introduces the background and rationale for work                                                                                                                      | ✓   |     |
| The last paragraph contains a brief summary of both the results and the conclusions (written in present tense)                                                        | ✓   |     |
| Contains no reference to display items (unless overview figures are presented)                                                                                        | ✓   |     |
|                                                                                                                                                                       |     |     |
| <b>Results</b>                                                                                                                                                        |     |     |
| Divided by subheadings less than 60 characters (incl spaces) that do not contain punctuation                                                                          | ✓   |     |
| All data are shown either in the main text or the supplement                                                                                                          | ✓   |     |
| If personal communication from another laboratory is cited, written permission is provided                                                                            |     | ✓   |
| Reference to Supplementary items format is (Supplementary Fig. S1), (Supplementary Table S1), (Supplementary Note 1), (Supplementary Data 1), (Supplementary Movie 1) | ✓   |     |

## MANUSCRIPT CHECKLIST

|                                                                                                                                                                                                  | Yes | N/A |
|--------------------------------------------------------------------------------------------------------------------------------------------------------------------------------------------------|-----|-----|
| <b>Discussion</b>                                                                                                                                                                                |     |     |
| Does not contains subheadings                                                                                                                                                                    | ✓   |     |
| Does not contain overlap with results section                                                                                                                                                    | ✓   |     |
|                                                                                                                                                                                                  |     |     |
| <b>METHODS</b>                                                                                                                                                                                   |     |     |
| No more than 1500 words                                                                                                                                                                          | ✓   |     |
| Methods are contained within main paper wherever possible                                                                                                                                        |     |     |
| Divided by subheadings less than 60 characters (incl spaces) that do not contain punctuation                                                                                                     | ✓   |     |
| Contain sufficient detail to repeat experiments (avoid 'as previously described')                                                                                                                | ✓   |     |
| For experiments involving live vertebrates and higher invertebrates, a statement of compliance with ethical regulations is provided and the committee approving the experiments is identified    |     | ✓   |
| Species, strain, sex and age of animals used is reported. We recommend following the ARRIVE reporting guidelines when documenting animal studies                                                 |     | ✓   |
| For experiments involving human subjects, a statement confirming that informed consent was obtained from all subjects must be provided and the committee approving the study protocol identified |     | ✓   |
| New species name has been deposited in Zoobank and LSIDs are provided                                                                                                                            |     | ✓   |
| Taxonomic description for new species has been provided                                                                                                                                          |     | ✓   |
| Microarray data are in MIAME format and accession numbers are provided                                                                                                                           |     | ✓   |
| Primer sequences are provided                                                                                                                                                                    |     | ✓   |
| Small RNA sequences are provided                                                                                                                                                                 |     | ✓   |
| Antibody sources and dilutions are listed                                                                                                                                                        |     | ✓   |
| Source of cell lines is identified                                                                                                                                                               |     | ✓   |
|                                                                                                                                                                                                  |     |     |
| <b>REFERENCES</b>                                                                                                                                                                                |     |     |
| No more than 60                                                                                                                                                                                  |     |     |
| Numbered in the order they appear in the text, tables, figures and boxes                                                                                                                         | ✓   |     |
| Formatted in Nature Communications style: 'Authors, Title, Journal, Volume, First-last page, (year)'                                                                                             | ✓   |     |
| References to web-only journals include: 'Authors, Title, Journal, url/doi and year of publication                                                                                               |     | ✓   |
| References to websites include: 'Authors (if known), Title of page, url and year of publication                                                                                                  |     | ✓   |
| Contains only published work or work in press                                                                                                                                                    | ✓   |     |
| Does not contain footnotes                                                                                                                                                                       | ✓   |     |
|                                                                                                                                                                                                  |     |     |
| <b>END NOTES</b>                                                                                                                                                                                 |     |     |
| Acknowledgements are brief                                                                                                                                                                       | ✓   |     |
| Author contributions statement is provided                                                                                                                                                       | ✓   |     |
| Conflict of interest statement is provided                                                                                                                                                       | ✓   |     |
| Accession codes of newly sequenced genes, coordinates of novel protein structures and/or datasets are included and repository defined                                                            |     | ✓   |
| New chemical structures have been deposited in CCDC and accession codes are provided                                                                                                             |     | ✓   |

## MANUSCRIPT CHECKLIST

|                                                                                                                                                                                                                                 | Yes | N/A |
|---------------------------------------------------------------------------------------------------------------------------------------------------------------------------------------------------------------------------------|-----|-----|
| <b>LEGENDS</b>                                                                                                                                                                                                                  |     |     |
| Contain a brief title                                                                                                                                                                                                           | ✓   |     |
| No more than 350 words each                                                                                                                                                                                                     | ✓   |     |
| Every panel is described                                                                                                                                                                                                        | ✓   |     |
| Length of scale bars is defined                                                                                                                                                                                                 | ✓   |     |
| Definitions for new abbreviations / symbols / colours is provided                                                                                                                                                               | ✓   |     |
| The exact sample size (n) for each experimental group/condition is given                                                                                                                                                        | ✓   |     |
| A statement of how many times the experiment was replicated is provided                                                                                                                                                         | ✓   |     |
| The name of the statistical test used is provided                                                                                                                                                                               | ✓   |     |
| The statistical test results is provided (e.g. P-values)                                                                                                                                                                        | ✓   |     |
| Error bars are defined as s.d. or s.e.m.                                                                                                                                                                                        | ✓   |     |
|                                                                                                                                                                                                                                 |     |     |
| <b>DISPLAY ITEMS</b>                                                                                                                                                                                                            |     |     |
| No more than 8 total                                                                                                                                                                                                            | ✓   |     |
| Fit within a column/page (including legend)                                                                                                                                                                                     | ✓   |     |
| Numbered in the order they appear in the main text                                                                                                                                                                              | ✓   |     |
|                                                                                                                                                                                                                                 |     |     |
| <b>Figures</b>                                                                                                                                                                                                                  |     |     |
| Figures do not contain tables                                                                                                                                                                                                   | ✓   |     |
| Figure panels are arranged into a rectangular shape                                                                                                                                                                             | ✓   |     |
| Each panel is labelled                                                                                                                                                                                                          | ✓   |     |
| Panels are not subdivided                                                                                                                                                                                                       | ✓   |     |
| Figure width is either 1 column (85mm) or two columns (180mm)                                                                                                                                                                   | ✓   |     |
| Scale bars are included (but not labelled within the figure)                                                                                                                                                                    |     | ✓   |
| Blots and gels contain molecular weight or size markers                                                                                                                                                                         |     | ✓   |
| Axes are labelled, including units                                                                                                                                                                                              | ✓   |     |
| Stereo figures sufficient width apart (equivalent points separated by 5.5cm)                                                                                                                                                    | ✓   |     |
| If possible, avoid the use of red and green in figures to avoid confusion for colour-blind readers (magenta and turquoise are alternatives)                                                                                     | ✓   |     |
|                                                                                                                                                                                                                                 |     |     |
| <b>Tables</b>                                                                                                                                                                                                                   |     |     |
| Include a title (no punctuation)                                                                                                                                                                                                |     | ✓   |
| Tables are editable (not embedded as a picture in the document)                                                                                                                                                                 |     | ✓   |
| If table legend is required, it is displayed underneath the table                                                                                                                                                               |     | ✓   |
|                                                                                                                                                                                                                                 |     |     |
| <b>SUPPLEMENTARY INFORMATION</b>                                                                                                                                                                                                |     |     |
| Provided as a single Word file (except for Movies, Audio and Data)                                                                                                                                                              |     | ✓   |
| Supplementary files are less than 30 MB                                                                                                                                                                                         | ✓   |     |
| Supplementary items are labelled and sections are displayed in the order: Supplementary Figure S1 / Supplementary Table S1 / Supplementary Note 1 / Supplementary Discussion / Supplementary Methods / Supplementary References | ✓   |     |
| Each Supplementary item is cited in the main text and in the correct order                                                                                                                                                      | ✓   |     |
| Figure legends are displayed underneath each figure; ideally, each display item and its corresponding legend fit on one page                                                                                                    |     | ✓   |

MANUSCRIPT CHECKLIST

|                                                                                                                                                                                                                                    | Yes | N/A |
|------------------------------------------------------------------------------------------------------------------------------------------------------------------------------------------------------------------------------------|-----|-----|
| <b>SUPPLEMENTARY INFORMATION (continued)</b>                                                                                                                                                                                       |     |     |
| Format of the legends is the same as in the main manuscript (please see section above)                                                                                                                                             | ✓   |     |
| Movie legends are provided in the cover letter                                                                                                                                                                                     |     | ✓   |
| Supplementary Reference numbering continues from main text, and reference list contains no duplication with the main text                                                                                                          |     | ✓   |
| Where portions of blots and gels have been presented in the main paper, the full blot or gel are included in the Supplementary Information                                                                                         |     | ✓   |
| Supplementary Information does not contain essential display items (these should be displayed in the main text)                                                                                                                    | ✓   |     |
| Supplementary Information does not contain Results                                                                                                                                                                                 | ✓   |     |
| NMR standard table for structural refinement statistics has been used ( <a href="http://www.nature.com/ncb/pdf/nsmb_tables_nmr_f.pdf">http://www.nature.com/ncb/pdf/nsmb_tables_nmr_f.pdf</a> )                                    |     | ✓   |
| X-ray standard table for structural refinement statistics has been used (please see <a href="http://www.nature.com/ncb/pdf/nsmb_tables_xray_f.pdf">http://www.nature.com/ncb/pdf/nsmb_tables_xray_f.pdf</a> )                      |     | ✓   |
| Stereo image of a portion of the electron density map (X-ray structures) or of the superimposed lowest energy structures (>10; NMR papers) is provided                                                                             |     | ✓   |
| Chemical structures are drawn using a Nature Chemistry Chemdraw template (please see <a href="http://www.nature.com/nchem/authors/submit/nchemstyleguide.pdf">http://www.nature.com/nchem/authors/submit/nchemstyleguide.pdf</a> ) |     | ✓   |
| Full chemical characterization (including <sup>1</sup> H NMR, <sup>13</sup> C NMR and mass spectrometry data) is provided for novel small molecules                                                                                |     | ✓   |
